# Supplementary material for: Influence of the cavity dimension on encapsulation of halides within the capsular assembly and side-cleft recognition of a sulfate–water cluster assisted by polyammonium tripodal receptors
Source: Royal Society of Chemistry journal article supplement (doi:10.1039/c6ce00220j), 2016-01-01
Supplement: c6ce00220j1.pdf [file c6ce00220j1.pdf]

## Electronic Supplementary Information

### **Influence of the cavity dimension on encapsulation of halide within the capsular assembly and side-cleft recognition of sulphate-water cluster assisted by polyammonium tripodal receptor**

Utsab Manna, Biswajit Nayak, Najbul Hoque and Gopal Das\*

*Department of Chemistry, Indian Institute of Technology Guwahati, Assam, 781 03, India,.*

*Fax: +91-361-258-2349; Tel: +91-361-258-2313*

*E-mail: [gdas@iitg.ernet.in](mailto:gdas@iitg.ernet.in)*

## Characterization of receptor L<sub>1</sub>:

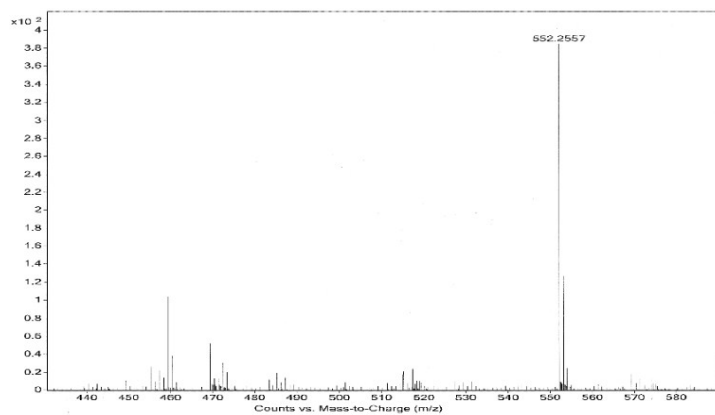

**Fig. S1.** ESI-mass spectrum of receptor L<sub>1</sub>

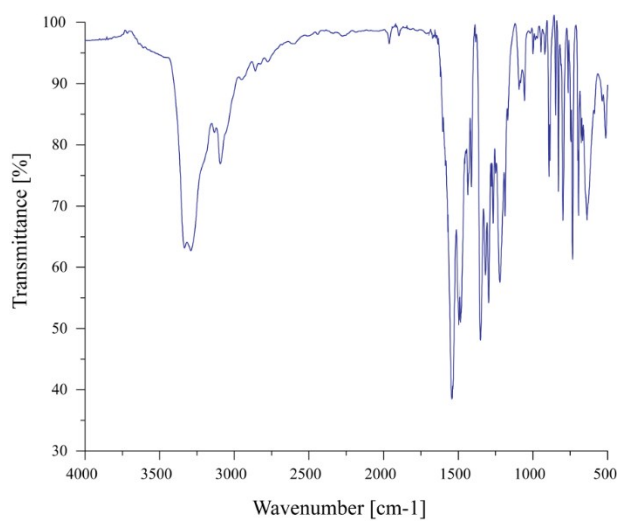

**Fig. S2.** FTIR spectrum of receptor L<sub>1</sub>

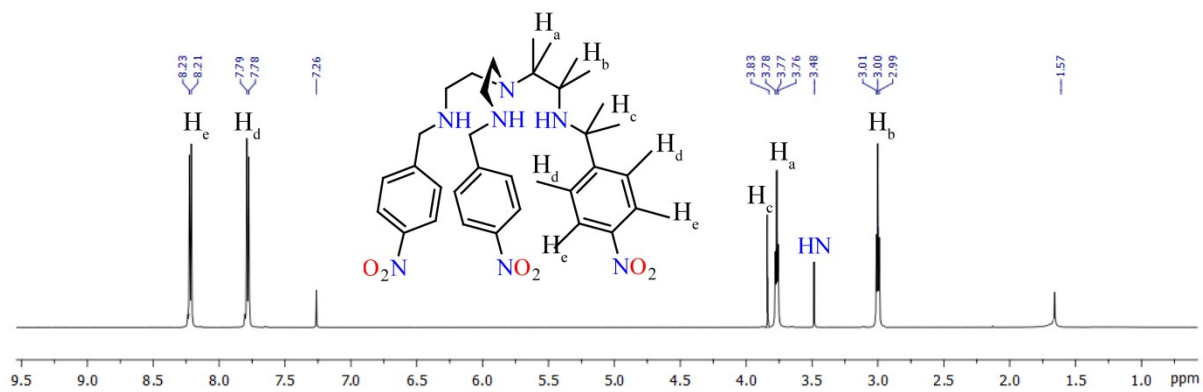

**Fig. S3.** <sup>1</sup>H NMR spectrum of receptor **L**<sub>1</sub> in CDCl<sub>3</sub> at 298 K

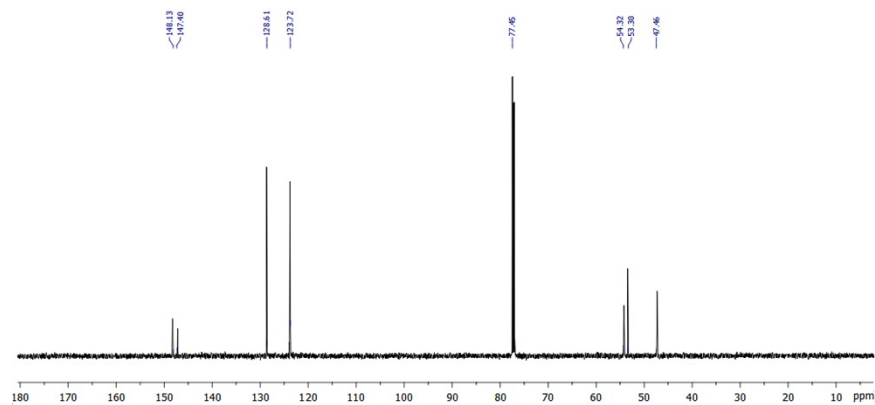

**Fig. S4.** <sup>13</sup>C NMR spectrum of receptor **L**<sub>1</sub> in CDCl<sub>3</sub> at 298 K

## Characterization of receptor $L_2$ :

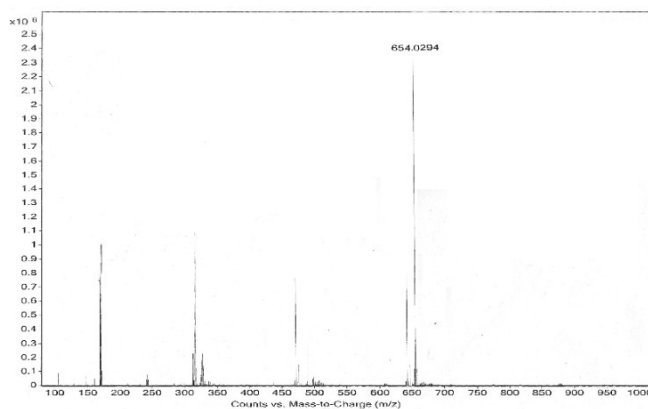

**Fig. S5.** ESI-mass spectrum of receptor  $L_2$

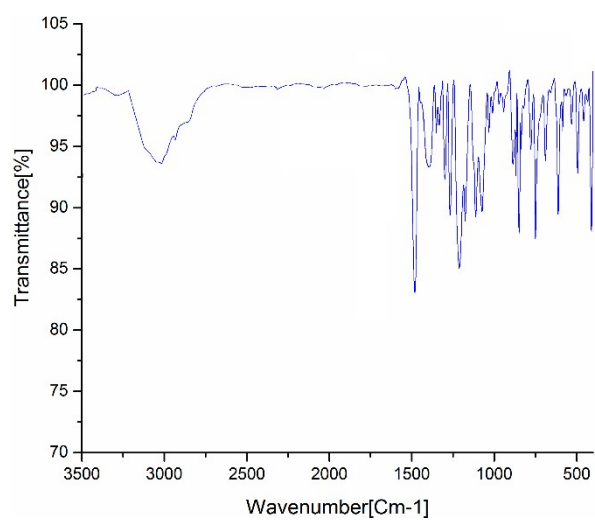

**Fig. S6.** FTIR spectrum of receptor  $L_2$

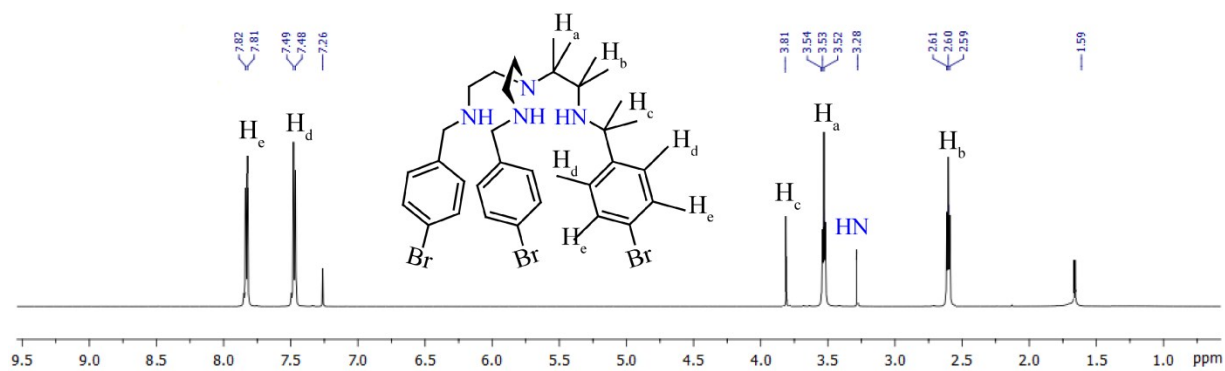

**Fig. S7.** <sup>1</sup>H NMR spectrum of receptor **L**<sub>2</sub> in CDCl<sub>3</sub> at 298 K

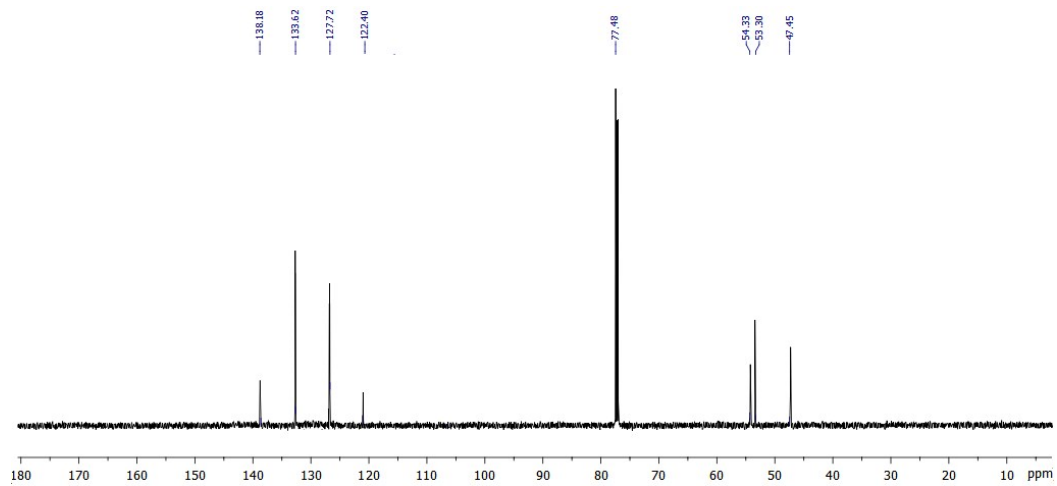

**Fig. S8.** <sup>13</sup>C NMR spectrum of receptor **L**<sub>2</sub> in CDCl<sub>3</sub> at 298 K

### Characterization of receptor $L_3$ :

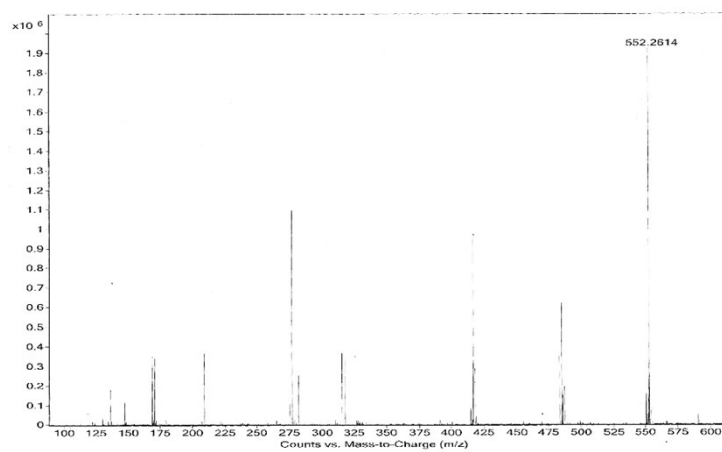

**Fig. S9.** ESI-mass spectrum of receptor  $L_3$

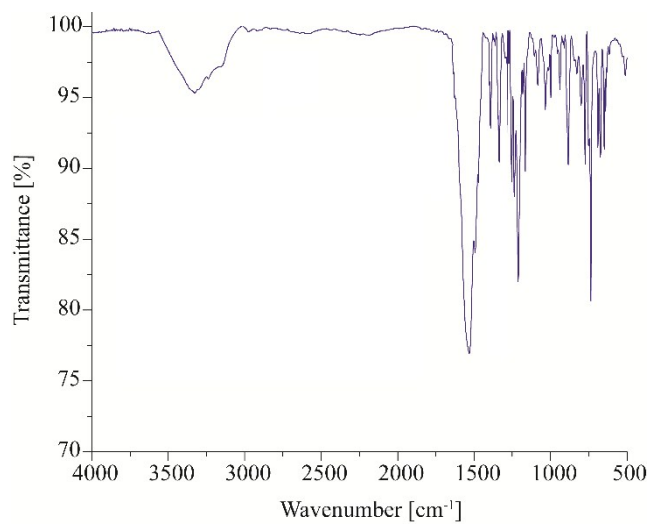

**Fig. S10.** FTIR spectrum of receptor  $L_3$

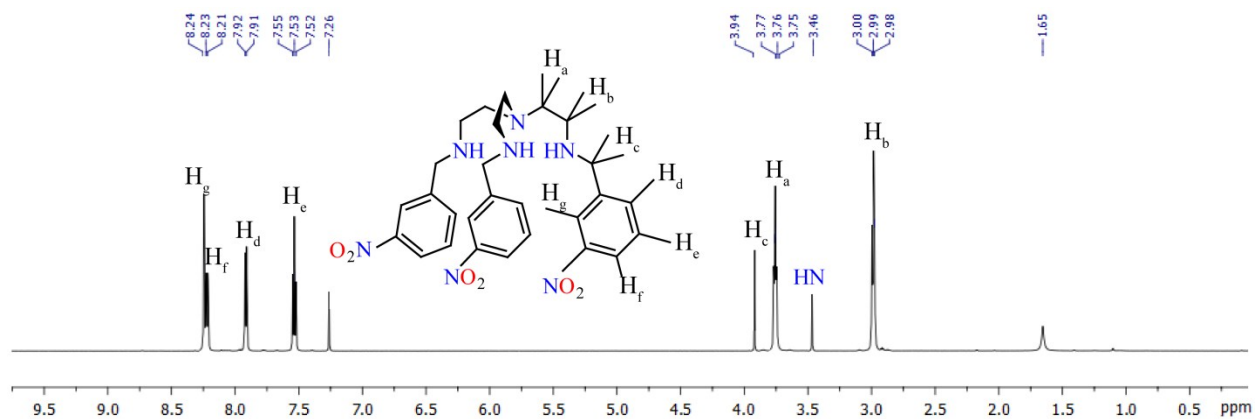

**Fig. S11.** <sup>1</sup>H NMR spectrum of receptor **L**<sub>3</sub> in CDCl<sub>3</sub> at 298 K

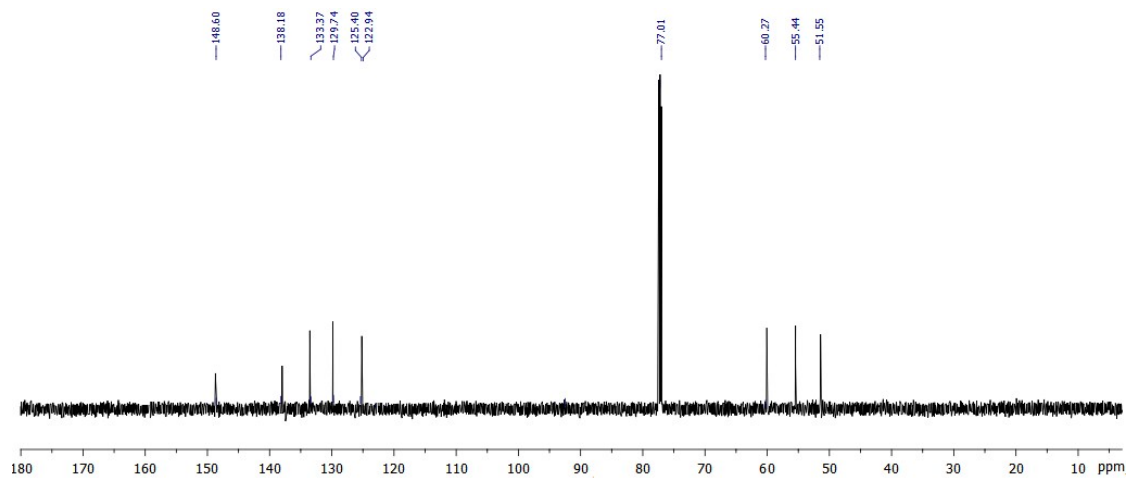

**Fig. S12.** <sup>13</sup>C NMR spectrum of receptor **L**<sub>3</sub> in CDCl<sub>3</sub> at 298 K

### Characterization of complex **1a**:

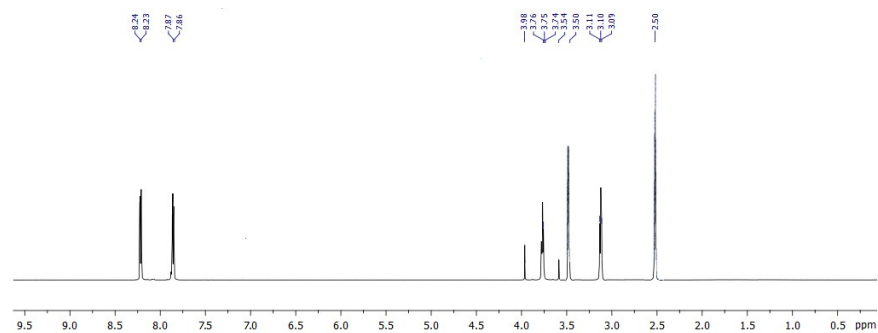

**Fig. S13.** <sup>1</sup>H NMR spectrum of complex **1a** in DMSO-d<sub>6</sub> at 298 K

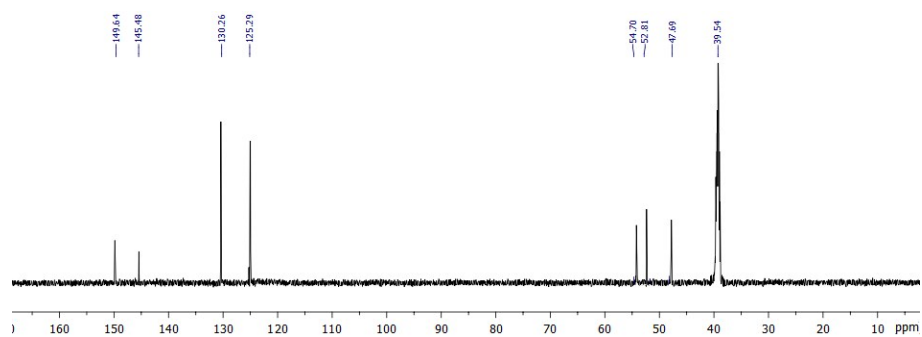

**Fig. S14.** <sup>13</sup>C NMR spectrum of complex **1a** in DMSO-d<sub>6</sub> at 298 K



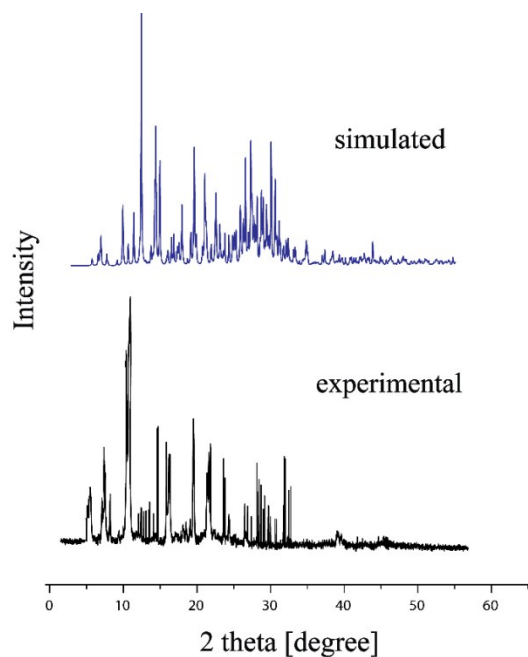

**Figure S15.** Powder X-ray diffraction: simulated pattern from the single-crystal X-ray of complex **1a** (blue), experimental pattern from the crystalline solid of complex **1a** (black).

### Characterization of complex **1b**:

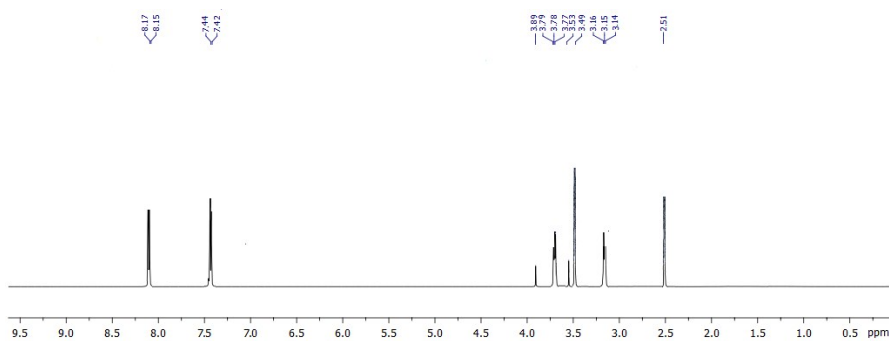

**Fig. S16.**  $^1\text{H}$  NMR spectrum of complex **1b** in  $\text{DMSO-d}_6$  at 298 K

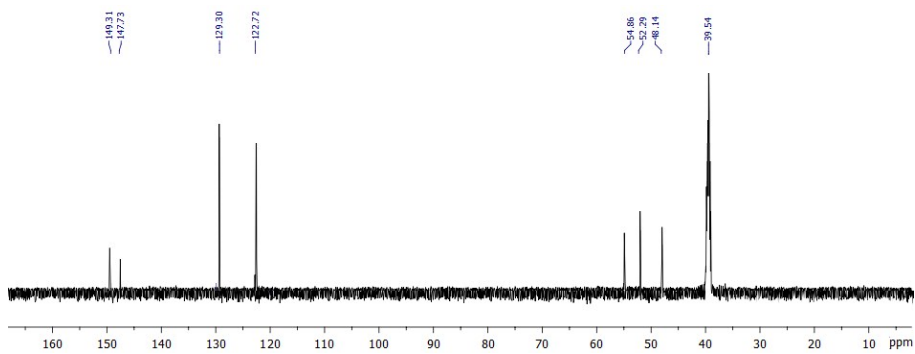

**Fig. S17.**  $^{13}\text{C}$  NMR spectrum of complex **1b** in  $\text{DMSO-d}_6$  at 298 K.

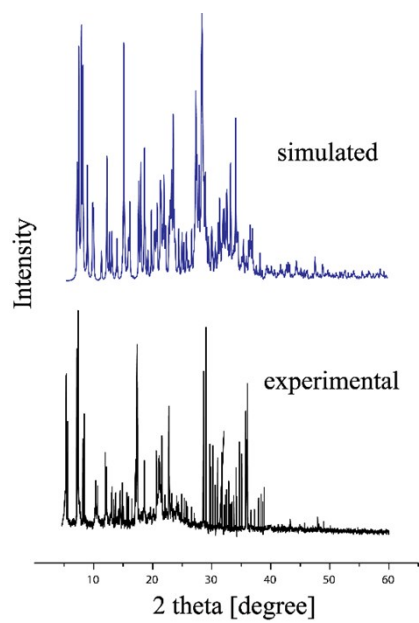

**Figure S18:** Powder X-ray diffraction: simulated pattern from the single-crystal X-ray of complex **1b** (blue), experimental pattern from the crystalline solid of complex **1b** (black).

## Characterization of complex **2a**:

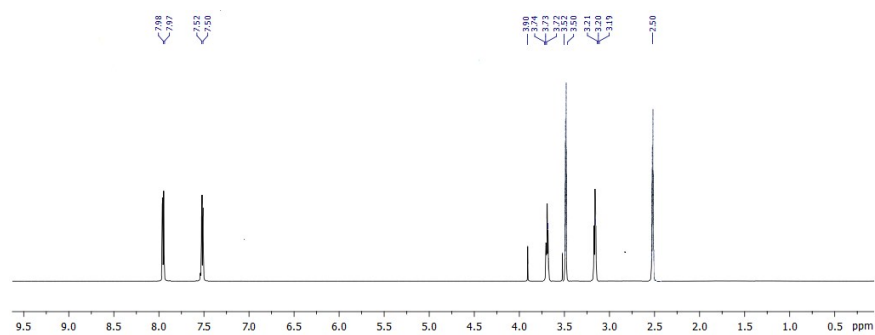

**Fig. S19.** <sup>1</sup>H NMR spectrum of complex **2a** in DMSO-d<sub>6</sub> at 298 K

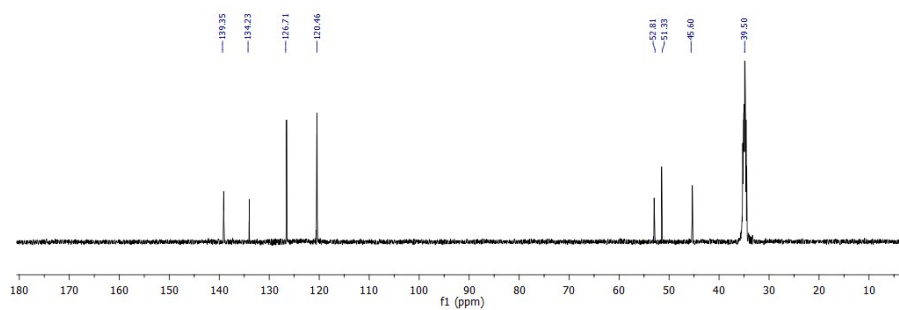

**Fig. S20.** <sup>13</sup>C NMR spectrum of complex **2a** in DMSO-d<sub>6</sub> at 298 K

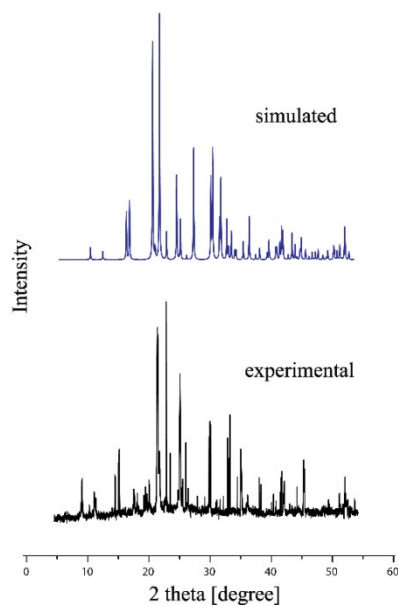

**Figure S21:** Powder X-ray diffraction: simulated pattern from the single-crystal X-ray of complex **2a** (blue), experimental pattern from the crystalline solid of complex **2a** (black).

### Characterization of complex **2b**:

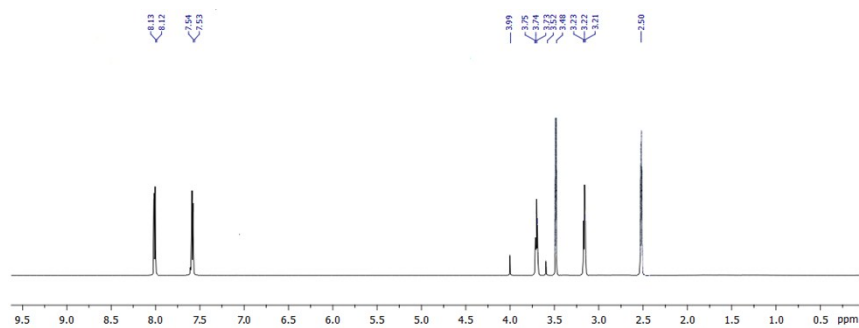

**Fig. S22.**  $^1\text{H}$  NMR spectrum of complex **2b** in  $\text{DMSO-d}_6$  at 298 K

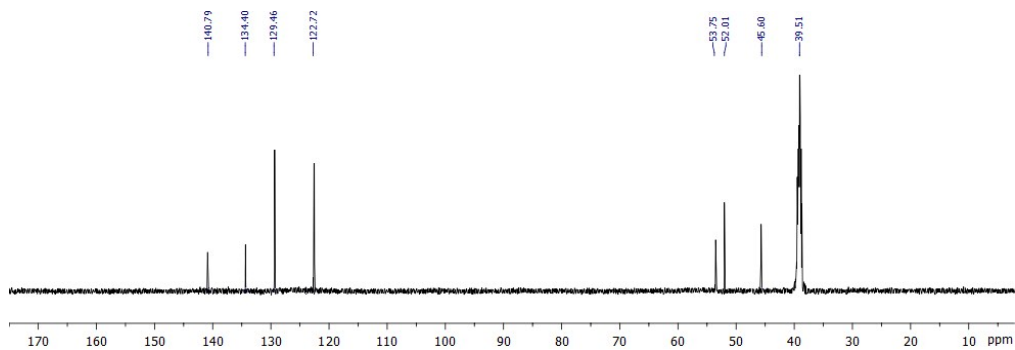

**Fig. S23:**  $^{13}\text{C}$  NMR spectrum of complex **2b** in  $\text{DMSO-d}_6$  at 298 K

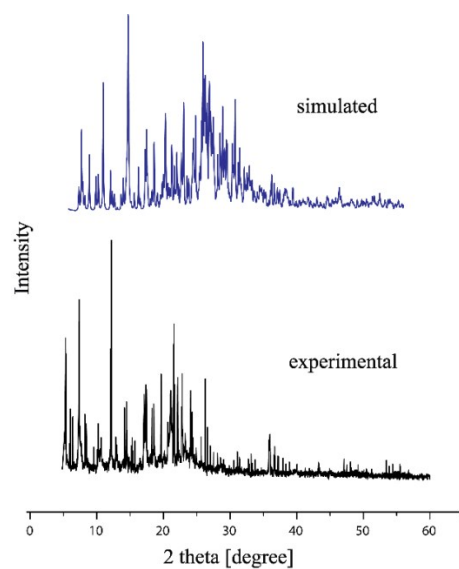

**Figure S24:** Powder X-ray diffraction: simulated pattern from the single crystal X-ray of complex **2b** (blue), experimental pattern from the crystalline solid of complex **2b** (black).

## Characterization of complex **3a**:

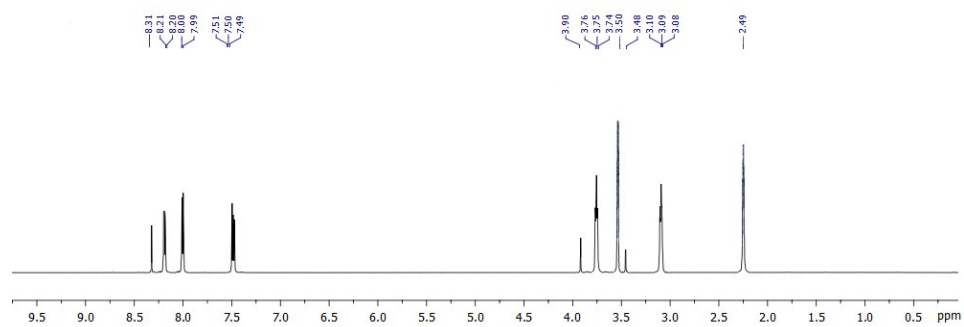

**Fig. S25:** <sup>1</sup>H NMR spectrum of complex **3a** in DMSO-d<sub>6</sub> at 298 K.

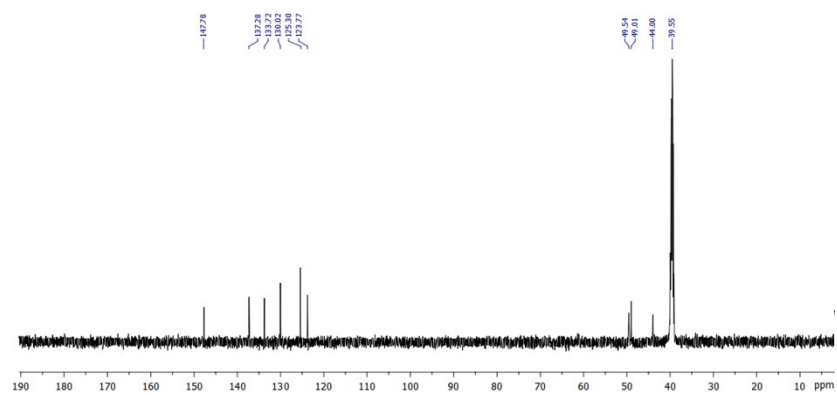

**Fig. S26:** <sup>13</sup>C NMR spectrum of complex **3a** in DMSO-d<sub>6</sub> at 298 K.

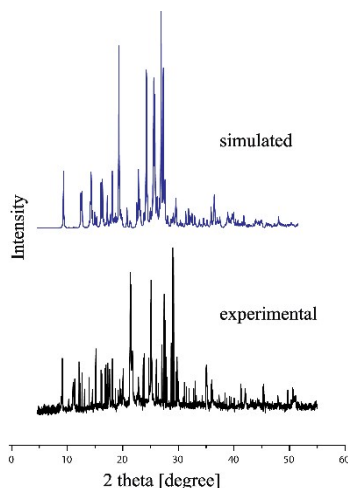

**Figure S27:** Powder X-ray diffraction: simulated pattern from the single-crystal X-ray of complex **3a** (blue), experimental pattern from the crystalline solid of complex **3a** (black).

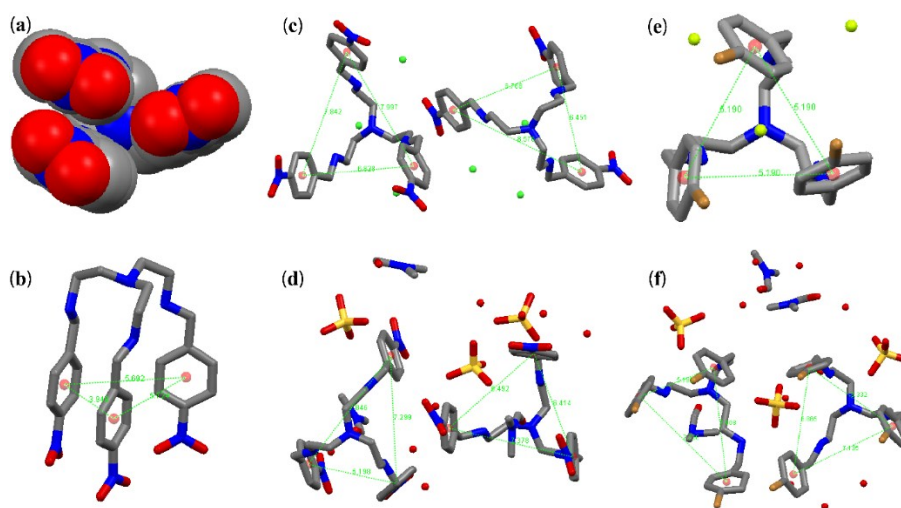

**Fig. S28:** (a) space-fill view of  $L_1$  receptor from crystallographic b axis showing there is almost no space or no cavity, (b) depicting distances among each  $L_1$  receptor arms, (c) depicting distances among each three arms of two  $L_1$  receptor units in salt **1a**, (d) depicting distances among each three arms of two  $L_1$  receptor units in salt **1b**, (e) depicting distances among each three arms of two  $L_2$  receptor units in salt **2a** and (f) depicting distances among each three arms of two  $L_2$  receptor units in salt **2b**.

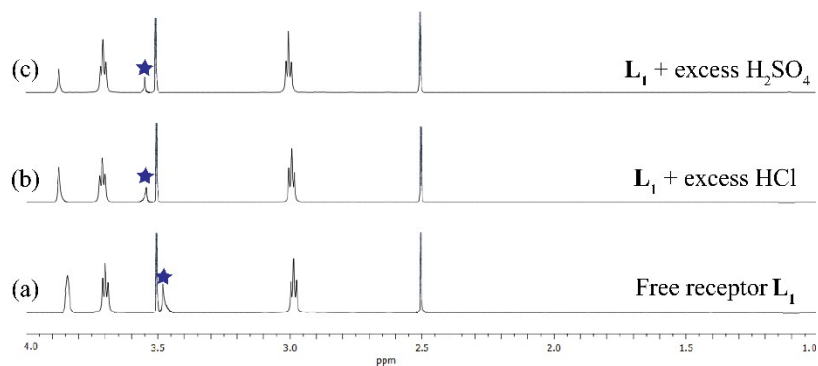

**Fig. S29:** Partial <sup>1</sup>H NMR spectra (600 MHz, DMSO d<sub>6</sub>) of (a) free receptor L<sub>1</sub>, (b) addition of excess HCl to L<sub>1</sub> and (c) addition of excess H<sub>2</sub>SO<sub>4</sub> to L<sub>1</sub>.

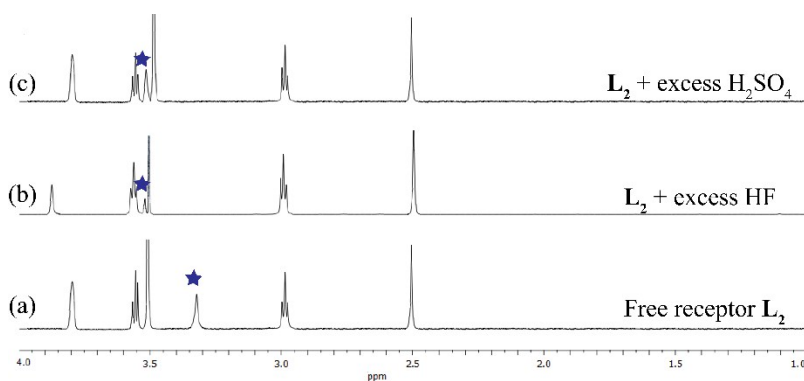

**Fig. S30:** Partial <sup>1</sup>H NMR spectra (600 MHz, DMSO d<sub>6</sub>) of (a) free receptor L<sub>2</sub>, (b) addition of excess HCl to L<sub>2</sub> and (c) addition of excess H<sub>2</sub>SO<sub>4</sub> to L<sub>2</sub>.

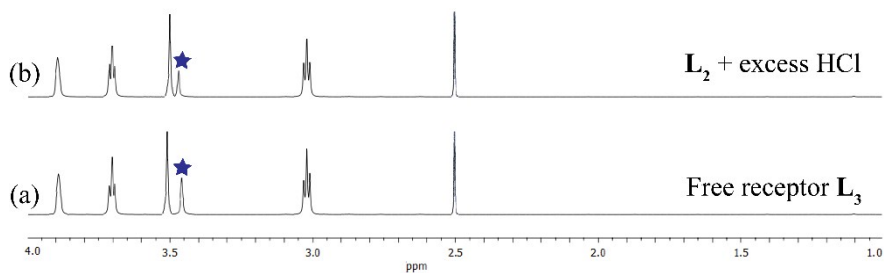

**Fig. S31:** Partial <sup>1</sup>H NMR spectra (600 MHz, DMSO d<sub>6</sub>) of (a) free receptor L<sub>3</sub> and (b) addition of excess HCl to L<sub>3</sub>.



**Table S1.** Hydrogen bonding contacts in complexes **1a-b**, **2a-b** and **3a**

| Complex   | D-H...A        | $d(\text{D}\cdots\text{H})/\text{\AA}$ | $d(\text{H}\cdots\text{A})/\text{\AA}$ | $d(\text{D}\cdots\text{A})/\text{\AA}$ | $\angle\text{D-H}\cdots\text{A}/^\circ$ | Symmetry codes        |
|-----------|----------------|----------------------------------------|----------------------------------------|----------------------------------------|-----------------------------------------|-----------------------|
| <b>1a</b> | N2-H2C...Cl6   | 0.90                                   | 2.22                                   | 3.092(5)                               | 164                                     | x,y,z                 |
|           | N2-H2D...Cl3   | 0.90                                   | 2.28                                   | 3.155(4)                               | 163                                     | x,y,z                 |
|           | N4-H4C...Cl3   | 0.90                                   | 2.21                                   | 3.077(5)                               | 162                                     | x,y,z                 |
|           | N4-H4D...Cl2   | 0.90                                   | 2.21                                   | 3.098(5)                               | 170                                     | -x, y-1/2, -z+3/2     |
|           | N6-H6C...Cl3   | 0.90                                   | 2.31                                   | 3.177(4)                               | 163                                     | x,y,z                 |
|           | N6-H6D...Cl2   | 0.90                                   | 2.28                                   | 3.140(5)                               | 161                                     | -x+1/2, -y+1, z-1/2   |
|           | N9-H9C...Cl1   | 0.90                                   | 2.35                                   | 3.237(4)                               | 167                                     | x,y,z                 |
|           | N9-H9D...Cl5   | 0.90                                   | 2.18                                   | 3.073(5)                               | 171                                     | x,y,z                 |
|           | N11-H11C...Cl1 | 0.90                                   | 2.31                                   | 3.184(5)                               | 164                                     | x,y,z                 |
|           | N11-H11D...Cl4 | 0.90                                   | 2.25                                   | 3.094(5)                               | 157                                     | -1/2+x, 1/2-y, -z     |
|           | N13-H13C...Cl1 | 0.90                                   | 2.25                                   | 3.129(5)                               | 167                                     | x,y,z                 |
|           | N13-H13D...Cl4 | 0.90                                   | 2.21                                   | 3.085(5)                               | 162                                     | -1+x,y,z              |
|           | C2-H2B...O2B   | 0.97                                   | 2.56                                   | 3.406(11)                              | 146                                     | 1-x, 1/2+y, 3/2-z     |
|           | C15-H15...O12  | 0.93                                   | 2.48                                   | 3.391(10)                              | 168                                     | -1/2-x, -y, 1/2+z     |
|           | C35-H35...O1A  | 0.93                                   | 2.51                                   | 3.385(10)                              | 157                                     | 3/2-x, -y, -1/2+z     |
|           | C35-H35...O1B  | 0.93                                   | 2.39                                   | 3.296(11)                              | 165                                     | 3/2-x, -y, -1/2+z     |
|           | C37-H37B...O4B | 0.97                                   | 2.52                                   | 3.382(17)                              | 148                                     | -x, 1/2+y, 1/2-z      |
|           | C50-H50...O4A  | 0.93                                   | 2.50                                   | 3.411(9)                               | 167                                     | -1/2+x, 1/2-y, -z     |
| <b>1b</b> | N2-H2N...O13   | 0.86                                   | 2.14                                   | 2.951(9)                               | 158                                     | x,y,z                 |
|           | N4-H4N...O13   | 0.86                                   | 2.30                                   | 3.063(8)                               | 148                                     | x,y,z                 |
|           | N9-H9N...O14   | 0.86                                   | 2.21                                   | 2.919(9)                               | 140                                     | x,y,z                 |
|           | N11-H11N...O14 | 0.86                                   | 2.30                                   | 3.108(9)                               | 156                                     | x,y,z                 |
|           | N13-H13N...O14 | 0.86                                   | 2.37                                   | 3.134(8)                               | 148                                     | x,y,z                 |
|           | C11-H11B...O21 | 0.97                                   | 2.59                                   | 3.529(14)                              | 163                                     | x,y,z                 |
|           | C19-H19B...O23 | 0.97                                   | 2.55                                   | 3.497(10)                              | 164                                     | -x, 1-y, 1-z          |
|           | C23-H23...O18  | 0.93                                   | 2.45                                   | 3.283(12)                              | 149                                     | -1+x,y,z              |
|           | C28-H28B...O23 | 0.97                                   | 2.53                                   | 3.469(9)                               | 163                                     | 1-x, -y, 1-z          |
|           | C44-H44...O2A  | 0.93                                   | 2.46                                   | 3.300(2)                               | 151                                     | 1-x, 1-y, 1-z         |
|           | C47-H47A...O28 | 0.97                                   | 2.59                                   | 3.415(14)                              | 143                                     | x,y,z                 |
|           | C54-H54...O16  | 0.93                                   | 2.54                                   | 3.368(13)                              | 148                                     | x,y,z                 |
|           | C55-H55C...O24 | 0.96                                   | 2.44                                   | 3.295(11)                              | 148                                     | -x, 1-y, 1-z          |
|           | C59-H59B...O20 | 0.96                                   | 2.54                                   | 3.414(13)                              | 151                                     | x,y,z                 |
| <b>2a</b> | N2-H2C...F1    | 0.90                                   | 1.72                                   | 2.614(6)                               | 173                                     | 2/3+x, 1/3+y, -2/3+z  |
|           | N2-H2D...F2    | 0.90                                   | 1.76                                   | 2.663(10)                              | 178                                     | 1-x+y, 1-x,z          |
|           | C1-H1B...F3    | 0.97                                   | 2.47                                   | 3.346(12)                              | 150                                     | 2/3-y, 1/3+x-y, 1/3+z |
|           | C3-H3A...F3    | 0.97                                   | 2.49                                   | 3.443(9)                               | 167                                     | x,y,z                 |

|                |                 |              |      |           |           |             |
|----------------|-----------------|--------------|------|-----------|-----------|-------------|
| <b>2b</b>      | N2-H2A...O4A    | 0.97         | 1.77 | 2.738(18) | 173       | x,1+y,z     |
|                | N2-H2A...O4B    | 0.97         | 1.78 | 2.715(13) | 162       | x,1+y,z     |
|                | N3-H3B...O12    | 0.97         | 1.75 | 2.710(10) | 168       | x,y,z       |
|                | N6-H6A...O3     | 0.90         | 1.86 | 2.758(9)  | 173       | x+1, y, z   |
|                | N6-H6B...O5     | 0.90         | 2.09 | 2.871(8)  | 145       | x,y,z       |
|                | N7-H7A...O3     | 0.97         | 2.18 | 2.932(9)  | 134       | x+1,y,z     |
|                | N7-H7B...O9     | 0.97         | 1.85 | 2.806(9)  | 167       | x+1,y,z     |
|                | N8-H8C...O9     | 0.97         | 2.07 | 2.910(9)  | 144       | x+1,y,z     |
|                | N8-H8D...O5     | 0.97         | 1.88 | 2.841(9)  | 172       | x,y,z       |
|                | C2-H2D...O11A   | 0.97         | 2.54 | 3.490(2)  | 166       | x,y,z       |
|                | C5-H5...O12     | 0.93         | 2.42 | 3.258(11) | 150       | x,y,z       |
|                | C11-H11B...O7B  | 0.97         | 2.58 | 3.550(2)  | 177       | x,y,z       |
|                | C20-H20B...O1   | 0.97         | 2.57 | 3.535(15) | 175       | x,1+y,z     |
|                | C21A-H21C...O14 | 0.86         | 2.55 | 3.260(4)  | 141       | x,1+y,z     |
|                | C45-H45...O3    | 0.93         | 2.51 | 3.317(16) | 146       | -x,1-y,1-z  |
|                | C47-H47A...O11A | 0.97         | 2.44 | 3.320(2)  | 151       | x+1,y,z     |
|                | C50-H50...O5    | 0.93         | 2.50 | 3.379(16) | 158       | 1-x,1-y,1-z |
|                | C56-H56C...O9   | 0.96         | 2.37 | 3.316(15) | 170       | -x,1-y,1-z  |
|                | <b>3a</b>       | N2-H2C...Cl2 | 0.90 | 2.24      | 3.075(10) | 153         |
| N2-H2D...Cl1   |                 | 0.90         | 2.28 | 3.152(10) | 164       | 1+x,1+y,z   |
| N4-H4C...Cl2   |                 | 0.90         | 2.40 | 3.285(12) | 167       | x,y,z       |
| N4-H4D...Cl6   |                 | 0.90         | 2.21 | 3.078(11) | 163       | x,y,z       |
| N6-H6C...Cl5   |                 | 0.90         | 2.25 | 3.137(11) | 166       | 1+x,1+y,z   |
| N6-H6D...Cl3   |                 | 0.90         | 2.25 | 3.110(11) | 159       | x,y,z       |
| N9-H9C...Cl6   |                 | 0.90         | 2.27 | 3.143(11) | 163       | x,y,z       |
| N9-H9D...Cl1   |                 | 0.90         | 2.21 | 3.078(10) | 162       | x,y,z       |
| N11-H11C...Cl4 |                 | 0.90         | 2.42 | 3.312(12) | 172       | x,y,z       |
| N11-H11D...Cl5 |                 | 0.90         | 2.18 | 3.051(11) | 162       | x,-1+y,z    |
| N13-H13C...Cl3 |                 | 0.90         | 2.28 | 3.160(10) | 167       | x,y,z       |
| N13-H13D...Cl4 |                 | 0.90         | 2.24 | 3.080(10) | 156       | x,y,z       |
| C21-H21B...O5A |                 | 0.97         | 2.57 | 3.462(2)  | 154       | -1+x,y,z    |
| C23-H23...O5A  |                 | 0.93         | 2.23 | 3.120(2)  | 160       | -1+x,y,z    |
| C23-H23...O5B  |                 | 0.93         | 2.50 | 3.190(2)  | 160       | -1+x,y,z    |
| C23-H23...O6   |                 | 0.93         | 2.57 | 3.375(18) | 145       | -1+x,y,z    |
| C30-H30B...O7A |                 | 0.97         | 2.54 | 3.450(2)  | 157       | -1+x,y,z    |
| C32-H32...O7A  |                 | 0.93         | 2.39 | 3.260(2)  | 155       | -1+x,y,z    |
| C32-H32...O7B  |                 | 0.93         | 2.38 | 3.270(2)  | 159       | -1+x,y,z    |
| C32-H32...O8   |                 | 0.93         | 2.51 | 3.339(18) | 148       | -1+x,y,z    |

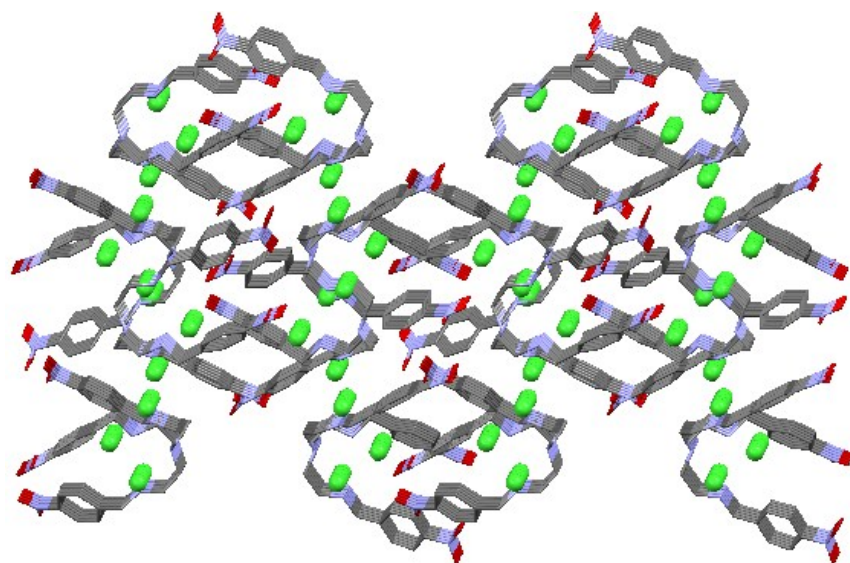

**Figure S32:** Packing motif of crystal structure of complex **1a** (as viewed down the *a*-axis) showing capsular assembly formation.

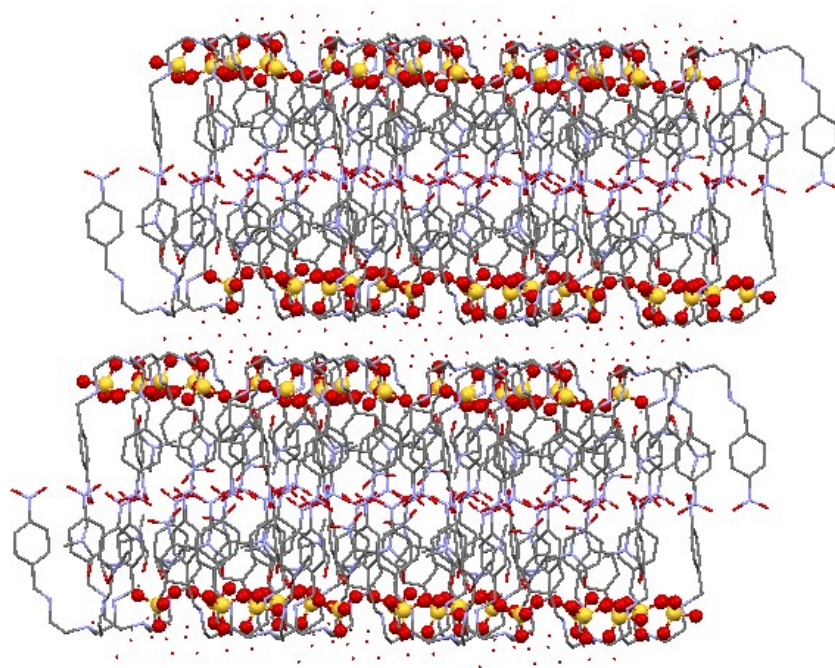

**Figure S33:** Packing motif of crystal structure of complex **1b** (as viewed down the *a*-axis) showing side-cleft binding of sulphate ions around DMF encapsulated receptor **L<sub>1</sub>**.

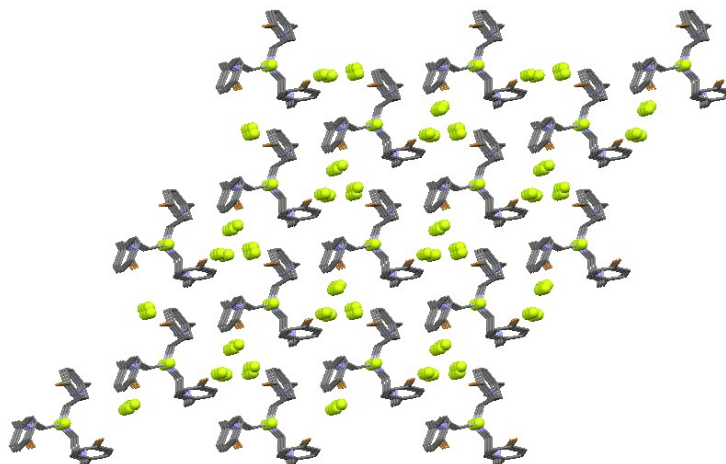

**Figure S34:** Packing motif of crystal structure of complex **2a** (as viewed down the *c*-axis) showing encapsulation of fluoride ion (F1) supported by H-bonding interactions with exterior fluorides (F2 and F3)

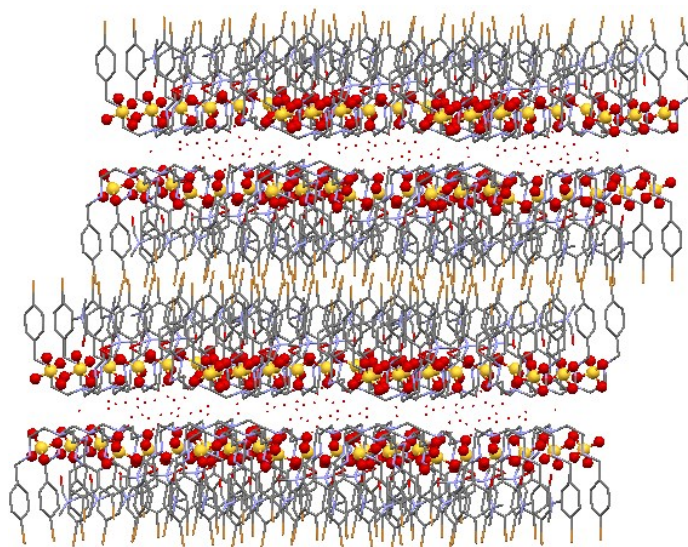

**Figure S35:** Packing motif of crystal structure of complex **2b** (as viewed down the *c*-axis) showing side-cleft binding of sulphate ions around DMF encapsulated receptor **L<sub>2</sub>**.

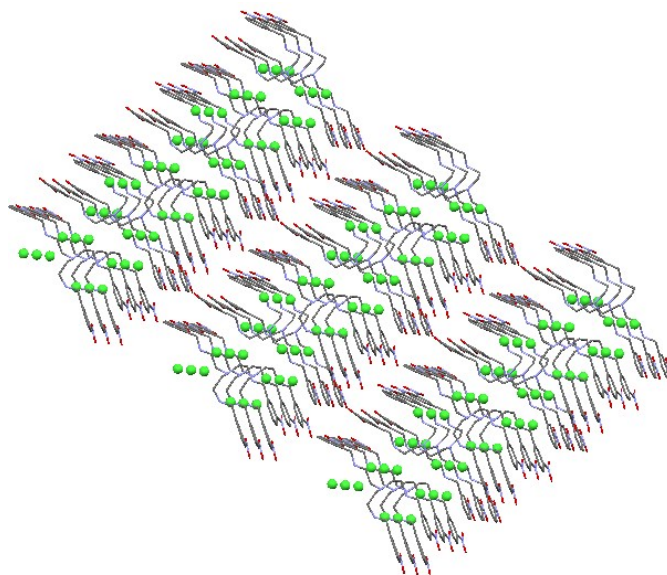

**Figure S36:** Packing motif of crystal structure of complex **3a** (as viewed down the *c*-axis) showing linear architecture of chloride via Y-shaped layer like assembly of receptor **L<sub>3</sub>**.
